# Supplementary material for: A wireless, battery-free temperature sensor utilizing the morphotropic phase boundary of HfxZr1−xO2 thin film
Source: Royal Society of Chemistry journal article supplement (doi:10.1039/d4tc03033h), 2025-01-01
Supplement: d4tc03033h1.pdf [file d4tc03033h1.pdf]

# A Wireless, Battery-Free Temperature Sensor Utilizing the Morphotropic Phase Boundary of $\text{Hf}_x\text{Zr}_{1-x}\text{O}_2$ Thin Film

*Ketong Yang<sup>a</sup>, Seungyeob Kim<sup>a</sup>, Taeseung Jung<sup>a</sup>, and Sanghun Jeon<sup>a,\*</sup>*

a. School of electrical engineering, Korea Advanced Institute of Science and  
Technology, 291 Daehak-ro, Yuseong-gu, Daejeon 34141, Korea

\*Corresponding authors: E-mail: [jeonsh@kaist.ac.kr](mailto:jeonsh@kaist.ac.kr)

**This file includes:**

**Figure S1. GIXRD of antiferroelectric and ferroelectric HZO films.**

**Figure S2. X-ray diffraction pattern of HZO films.**

**Figure S3. Dielectric constant as a function of the temperature.**

**Table S1. Comparative analysis of existing wireless temperature sensors.**

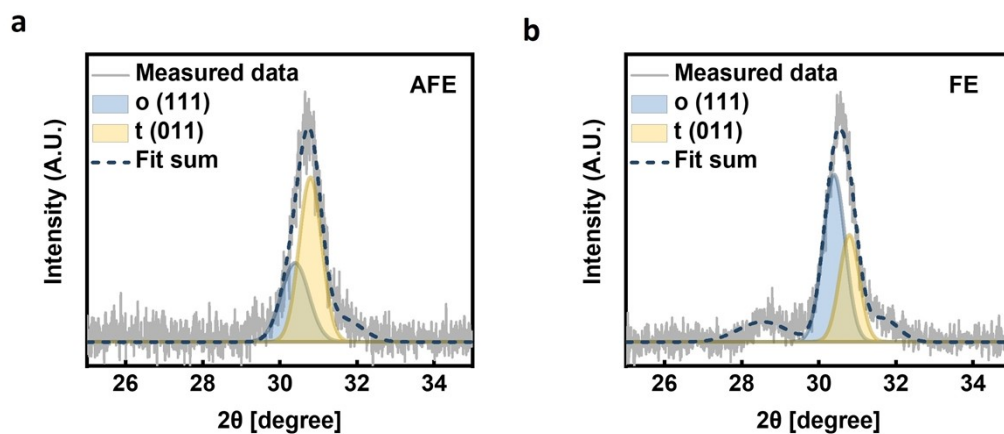

**Figure S1.** GIXRD of antiferroelectric and ferroelectric HZO films.

Figure S1a illustrates an antiferroelectric sample, in which the o-phase content is substantially lower than that of the t-phase. Conversely, Figure S1b depicts a ferroelectric sample, where the o-phase is predominant and surpasses the t-phase content.

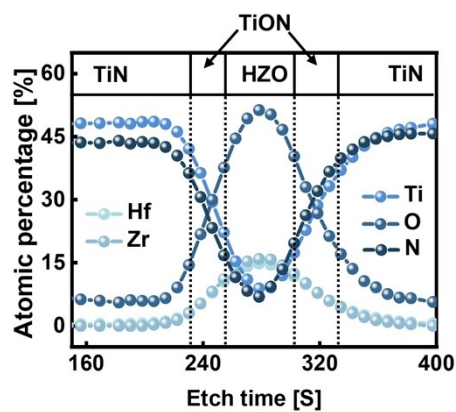

**Figure S2.** X-ray diffraction pattern of HZO films.

As etch time progresses, the sample exhibits a transition from TiN to TiON and subsequently to HZO. Furthermore, a relatively deep atomic diffusion at the bottom interface is observed, which is attributed to the unavoidable plasma-induced damage during the HZO deposition process.

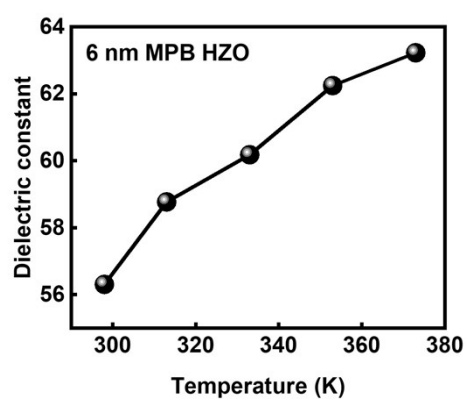

**Figure S3.** Dielectric constant as a function of the temperature.

The dielectric constant at  $E_C$  (0 V) increases from 56.3 at 297 K to 63.2 at 373 K.

| Material                                         | Integration | Temperature range | Wireless distance | Battery-Free | Reference # |
|--------------------------------------------------|-------------|-------------------|-------------------|--------------|-------------|
| Polyethylene Glycol                              | No          | 305 K- 315 K      | 16 mm             | Yes          | 1           |
| CNT/SnO <sub>2</sub>                             | No          | 291 K- 298 K      |                   | No           | 2           |
| PEDOT: PSS                                       | No          | 303 K- 323 K      |                   | No           | 3           |
| Plasmonic material TiN                           | Yes         | 293 K -373 K      | No                | No           | 4           |
| BaTiO <sub>3</sub>                               | No          | 303 K- 323 K      |                   | Yes          | 5           |
| PDMS-CF                                          | No          | 293 K -373 K      |                   | Yes          | 6           |
| PEDOT: PSS                                       | No          | 293 K -378 K      |                   | Yes          | 7           |
| Hf <sub>x</sub> Zr <sub>1-x</sub> O <sub>2</sub> | Yes         | 293 K -373 K      |                   | Yes          | This work   |

**Table S1.** Comparative analysis of existing wireless temperature sensors.

This table presents a comparison of key parameters of state-of-the-art temperature sensors developed over the past five years <sup>1-7</sup>.

## Reference

1. D. Lu, Y. Yan, R. Avila, I. Kandela, I. Stepien, M. H. Seo, W. Bai, Q. Yang, C. Li and C. R. Haney, *Advanced Healthcare Materials*, 2020, **9**, 2000942.
2. Y. Lu, Y. Fujita, S. Honda, S. H. Yang, Y. Xuan, K. Xu, T. Arie, S. Akita and K. Takei, *Advanced Healthcare Materials*, 2021, **10**, 2100103.
3. W. Fan, T. Liu, F. Wu, S. Wang, S. Ge, Y. Li, J. Liu, H. Ye, R. Lei and C. Wang, *ACS nano*, 2023, **17**, 21073-21082.
4. R. Rahad, M. M. Sobhani, M. J. H. Emon, S. M. T.-S. Afrid, M. K. Mahadi, A. S. Mohsin, M. O. Faruque and R. H. Sagor, *Optics Communications*, 2024, **569**, 130749.
5. G. Clementi, I. Neri, F. Cottone, A. Di Michele, M. Mattarelli, L. Sforza, S. Chiappalupi, G. Sorci, A. Michelucci and L. Catacuzzeno, *Nano Energy*, 2024, **121**, 109211.
6. B. King, N. Bruce and M. Wagih, *Advanced Science*, 2025, 2412066.
7. Y. Wang, Z. Chen, T. Huang, J. Ren, J. Zhang, Z. Yuan and G. Shen, *Nano Energy*, 2025, **133**, 110492.
